# Supplementary material
Source: publisher site journal article supplement (https://www.dovepress.com/article/600152)
Supplement: Supplementary file 1 [file 600152%20Supplementary%20File%201.docx]

**Supplementary file 1: Consolidated criteria for reporting qualitative studies (COREQ): 32-item checklist21**

| **No. Item** | **Guide questions/description** | **Reported on Page #** |
| --- | --- | --- |
| **Domain 1: Research team and reﬂexivity** | | |
| ***Personal Characteristics*** | | |
| 1. Inter viewer/facilitator | Which author/s conducted the interview or focus group? | The first author; Page 5, line 125. |
| 2. Credentials | What were the researcher’s credentials? E.g. PhD, MD | The first author, RN;  The second author,MD ;  The third author, PhD;  The correspondence author, RN |
| 3. Occupation | What was their occupation at the time of the study? | The fisrt author, RN; Nursing supervisor;  the second author, Medical Doctor;  the third author,Medical Doctor ;  the correspondence author, Nursing supervisor；Nursing supervisor |
| 4. Gender | Was the researcher male or female? | female |
| 5. Experience and training | What experience or training did the researcher have? | All authors were trained in qualitative research. Page 5, line 125. |
| ***Relationship with participants*** | | |
| 6. Relationship established | Was a relationship established prior to study commencement? | Yes, page 4, lines 79-91. |
| 7. Participant knowledge of the interviewer | What did the participants know about the researcher? e.g. personal goals, reasons for doing the research | All participants were informed about the purpose and procedure of this study prior to interview. |
| 8. Interviewer characteristics | What characteristics were reported about the interviewer/facilitator? e.g. Bias, assumptions, reasons and interests in the research topic | Page 6, lines 135-142. |
| **Domain 2: study design** | | |
| ***Theoretical framework*** | | |
| 9. Methodological orientation and Theory | What methodological orientation was stated to underpin the study? e.g. grounded theory, discourse analysis, ethnography, phenomenology, content analysis | Page 6, line 149. |
| ***Participant selection*** | | |
| 10. Sampling | How were participants selected? e.g. purposive, convenience, consecutive, snowball | Page 4 , line 103. |
| 11. Method of approach | How were participants approached? e.g. face-to-face, telephone, mail, email | Page 5 , lines 117. |
| 12. Sample size | How many participants were in the study? | Fourteen. |
| 13. Non-participation | How many people refused to participate or dropped out? Reasons? | Two patients declined due to their unwillingness to undergo surgery. |
| ***Setting*** | | |
| 14. Setting of data collection | Where was the data collected? e.g. home, clinic, workplace | Page 5, line 126. |
| 15. Presence of non-participants | Was anyone else present besides the participants and researchers? | No. |
| 16. Description of sample | What are the important characteristics of the sample? e.g. demographic data, date | Page 7, lines 168-173. |
| ***Data collection*** | | |
| 17. Interview guide | Were questions, prompts, guides provided by the authors? Was it pilot tested? | Yes, an outline of the interviews is presented in Figure Preinterviews were conducted with three patients to refine the interview content. |
| 18. Repeat interviews | Were repeat interviews carried out? If yes, how many? | No. |
| 19. Audio/visual recording | Did the research use audio or visual recording to collect the data? | Yes. Page 6, line 144. |
| 20. Field notes | Were ﬁeld notes made during and/or after the interview or focus group? | Page 6, lines 133-134. |
| 21. Duration | What was the duration of the interviews or focus group? | Page 5, line 127. |
| 22. Data saturation | Was data saturation discussed? | Yes. Page 5, lines 112-115. |
| 23. Transcripts returned | Were transcripts returned to participants for comment and/or correction? | Page 6, line 145. |
| **Domain 3: analysis and ﬁndings** | | |
| ***Data analysis*** | | |
| 24. Number of data coders | How many data coders coded the data? | Two |
| 25. Description of the coding tree | Did authors provide a description of the coding tree? | Table 3. |
| 26. Derivation of themes | Were themes identiﬁed in advance or derived from the data? | Themes were determined according to the COM-B theoretical framework. |
| 27. Software | What software, if applicable, was used to manage the data? | Page 6, line 147. |
| 28. Participant checking | Did participants provide feedback on the ﬁndings? | No |
| ***Reporting*** | | |
| 29. Quotations presented | Were participant quotations presented to illustrate the themes/ﬁndings? Was each quotation identiﬁed? e.g. participant number | Pages 7-12. |
| 30. Data and ﬁndings consistent | Was there consistency between the data presented and the ﬁndings? | Yes |
| 31. Clarity of major themes | Were major themes clearly presented in the ﬁndings? | Yes, Pages 7-12. |
| 32. Clarity of minor themes | Is there a description of diverse cases or discussion of minor themes? | Yes, Pages 7-12. |
